# Supplementary material for: Functional and structural studies on the Neisseria gonorrhoeae GmhA, the first enzyme in the glycero‐manno‐heptose biosynthesis pathways, demonstrate a critical role in lipooligosaccharide synthesis and gonococcal viability
Source: PubMed Central journal article supplement (PMC5387315; doi:10.1002/mbo3.432), 2017-01-07

## SUPPLEMENTAL MATERIAL

### Supplemental Table S1. Plasmids and oligonucleotides used in this study.

| Plasmid Name                   | Reference                             |
|--------------------------------|---------------------------------------|
| pRSF-NT                        | (Korotkov <i>et al.</i> , 2013)       |
| pGCC4                          | (Skaar <i>et al.</i> , 2002)          |
| pUC18                          | (Yanisch-Perron <i>et al.</i> , 1985) |
| pUC18K                         | (Menard <i>et al.</i> , 1993)         |
| pRSF-NT-Gmh <sub>AGC</sub>     | This study                            |
| pRSF-NT-Zwf                    | This study                            |
| pGCC4-Gmh <sub>AGC</sub>       | This study                            |
| pUC18K-Gmh <sub>AGC</sub>      | This study                            |
| pUC18-Gmh <sub>AGC</sub>       | This study                            |
| pUC18-Gmh <sub>AGC</sub> E65A  | This study                            |
| pUC18-Gmh <sub>AGC</sub> H183A | This study                            |
| pGCC4-Gmh <sub>AGC</sub> E65A  | This study                            |
| pGCC4-Gmh <sub>AGC</sub> H183A | This study                            |
| pGCC4-Gmh <sub>ANM</sub>       | This study                            |
| pUC18K-Gmh <sub>ANM</sub>      | This study                            |
| pGCC4-Gmh <sub>AEC</sub>       | This study                            |

  

| Oligonucleotide                                                          | Sequence <sup>1</sup>               |
|--------------------------------------------------------------------------|-------------------------------------|
| Primers used for creating recombinant protein with N-terminal 6×His-tag: |                                     |
| rNGO1986-F                                                               | GGATTTACCCATGGCGACATTACAAGAACGCG    |
| rNGO1986-R                                                               | ACTCGGTCAAGCTTCATTCTTCCAGCAGTACG    |
| rZwf-F                                                                   | GACTCCATGGGTACACAGACAAATTTTGATTTGG  |
| rZwf-R                                                                   | GATCAAGCTTGCATTACTGTTCTTCGTGC       |
| Primers used for gene deletion and complementation:                      |                                     |
| NGO1986-Up-F                                                             | GACTGATAGAATTCGCGCAGGGTAATGTCTG     |
| NGO1986-Up-R                                                             | ATCGATGGTACCGCAACGCGTTCTTGTAAATG    |
| NGO1986-Down-F                                                           | GGATTTACGGATCCACTGTATCGACTCCGTACTGC |
| NGO1986-Down-R                                                           | ACTCGGTCAAGCTTTGATGCCAGCAGCGTG      |
| NGO1986-RBS-F                                                            | GAATATTACAGGTTGACGATATG             |
| NGO1986-RBS-R                                                            | AAGCTTGGCCGGCCTTACATTCTTCCAGCAG     |
| pGCC4-Ver-F                                                              | AAATCGCCCTTGATACCG                  |
| pGCC4-Ver-R                                                              | ACACTTTATGCTTCCGGCTC                |
| NGO1986-Ver-F                                                            | GCCGGCGTACCCGCAT                    |

|                |                                                  |
|----------------|--------------------------------------------------|
| NGO1986-Ver-R  | TGAAGGCGGTTTCAGACGGC                             |
| NMB2090-Up-F   | GACTGATAGA <u>AATTC</u> CAATACCGCCAAAGCG         |
| NMB2090-Down-R | ACTCGGTCA <u>AAGCTT</u> TGATGCCCAACAGCGTG        |
| ECBD3400-RBS-F | TTATGCTGAAGGATATCCTC                             |
| ECBD3400-RBS-R | AAGCTT <u>GGCCGGCC</u> TTACTTAACCATCTCTTTTTCAATC |

Primers used for the mutagenesis of the GmhA<sub>GC</sub> conserved residues E65 and H183:

|         |                         |
|---------|-------------------------|
| E65A-F  | CTTCGCCGCCGCAATGACCGGGC |
| E65A-R  | TGTTGCGCGTCGGCAGCC      |
| H183A-F | CCTGCTGATAGCCGCCATGTGCG |
| H183A-R | ATGTGGTTTTCTGAATGC      |

Primers used for the sequencing of lactose operator and promoter:

|           |                           |
|-----------|---------------------------|
| LACOP-F   | TCCCTTAACTTGTTTTTCGTGTACC |
| LACOP-R   | CGCTTACCCTTCCTGAAGACA     |
| LACOP-SEQ | CCGACATCATAACGGTTCTGGC    |

---

<sup>1</sup> Sequences recognized by restriction enzymes are underlined.

## Supplemental Figure Legends

**Supplemental Figure S1. Purification of rGmhA<sub>GC</sub>.** **A.** rGmhA<sub>GC</sub> eluted mainly as tetramers during size exclusion chromatography. Purified rGmhA<sub>GC</sub> was separated by NGC Scout Chromatography system (Bio-Rad) with HiLoad 16/600 Superdex 75 pg column (GE Healthcare Life Sciences). Elution chromatogram of rGmhA<sub>GC</sub> is indicated by blue line. Predicted mass of a monomeric rGmhA<sub>GC</sub> is 21.1 kDa. Gel Filtration Standard (BioRad) is shown on the chromatogram as the red line. **B.** Increasing amounts of rGmhA<sub>GC</sub> after removal of His-tag by TEV protease were resolved by SDS-PAGE and visualized by Coomassie Brilliant Blue G-250 staining. The migration of molecular mass markers (kDa) is indicated on the left.

**Supplemental Figure S2. The *Neisseria gonorrhoeae* FA1090  $\Delta gmhA_{GD}/P_{lac}::gmhA_{GC}$  acquires mutations in  $P_{lac}$  during growth under non-permissive conditions.** **A.** The *N. gonorrhoeae* FA1090  $\Delta gmhA_{GD}/P_{lac}::gmhA_{GC}$ , was streaked out from frozen glycerol stock on solid media supplemented with 20  $\mu$ M IPTG. Following 18 h of incubation at 37 °C in the presence of 5% atmospheric CO<sub>2</sub>, the non-piliated colonies were passaged onto plates either with (+) or without IPTG (-). Bacterial colonies that arose on media without IPTG (-) were passaged (passage II) further onto plates either with (+) or without IPTG (-) and incubated for 18 h at 37 °C, 5% CO<sub>2</sub>. Colonies that grew on media lacking IPTG were once more streaked (passage III) onto plates either with (+) or without IPTG (-) and allowed to grow for 18 h at 37 °C, 5% CO<sub>2</sub>. **B.** The lactose promoter ( $P_{lac}$ ) sequence of the  $gmhA_{GD}/P_{lac}::gmhA_{GC}$  maintained in the presence of IPTG and after three passages on media without IPTG were determined by DNA Sanger sequencing. The sequence of  $P_{lac}$  from *E. coli* is shown. Nucleotides that differed from the default  $P_{lac}$  sequence are highlighted in red color. **C.** The FA1090 wt,  $\Delta gmhA_{GD}/P_{lac}::gmhA_{GC}$ , and  $\Delta gmhA_{GD}/P_{lac}::gmhA_{GC}$  after three passages on media without IPTG were harvested from solid media with (+) or without 20  $\mu$ M IPTG (-) and whole cell lysates were either probed with polyclonal rabbit antisera or subjected to LOS extraction using proteinase K followed by silver staining. Samples were matched by the same OD<sub>600</sub> units. The migration of molecular mass marker (kDa) is indicated on the left.

**Supplemental Figure S3. Loading controls for immunoblotting experiments.** Samples of whole-cell lysates were prepared for SDS-PAGE as described in the text, separated in 10-20% Tris-Glycine gel and the protein profiles were visualized using

Coomassie Brilliant Blue G-250. Loaded OD<sub>600</sub> units matched the corresponding samples used in immunoblotting analyses of GmhA<sub>GC</sub> and Zwf. The migration of molecular mass markers (kDa) is indicated on the left.

#### **Supplemental Figure S4. Analysis of single nucleotide polymorphisms in *gmhA*.**

Analysis of *gmhA* (locus NGO1986, NMB2090, NMC2070) in 39,182 *Neisseria spp* genomes deposited into PubMLST database (<http://pubmlst.org/neisseria/> as of July, 20, 2016) showed that there are 340 *gmhA* alleles and 323 single nucleotide polymorphic sites.

#### **REFERENCES**

- Korotkov, K.V., J.R. Delarosa & W.G. Hol, (2013) A dodecameric ring-like structure of the N0 domain of the type II secretin from enterotoxigenic *Escherichia coli*. *Journal of structural biology* **183**: 354-362.
- Menard, R., P.J. Sansonetti & C. Parsot, (1993) Nonpolar mutagenesis of the *ipa* genes defines *IpaB*, *IpaC*, and *IpaD* as effectors of *Shigella flexneri* entry into epithelial cells. *Journal of Bacteriology* **175**: 5899-5906.
- Skaar, E.P., M.P. Lazio & H.S. Seifert, (2002) Roles of the *recJ* and *recN* genes in homologous recombination and DNA repair pathways of *Neisseria gonorrhoeae*. *Journal of Bacteriology* **184**: 919-927.
- Yanisch-Perron, C., J. Vieira & J. Messing, (1985) Improved M13 phage cloning vectors and host strains: nucleotide sequences of the M13mp18 and pUC19 vectors. *Gene* **33**: 103-119.

Supplemental Figure S1

A.

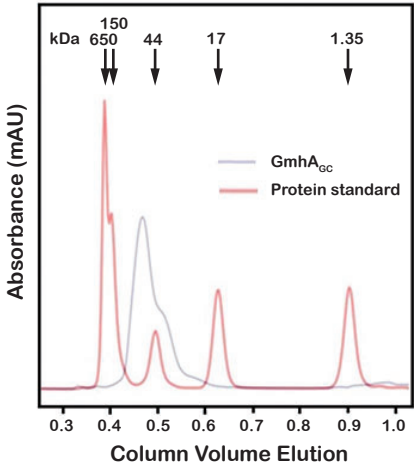

B.

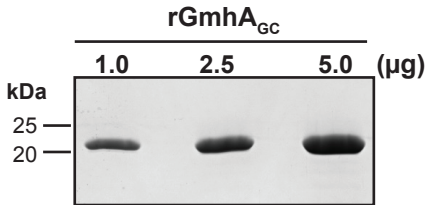

## Supplemental Figure S2

A.

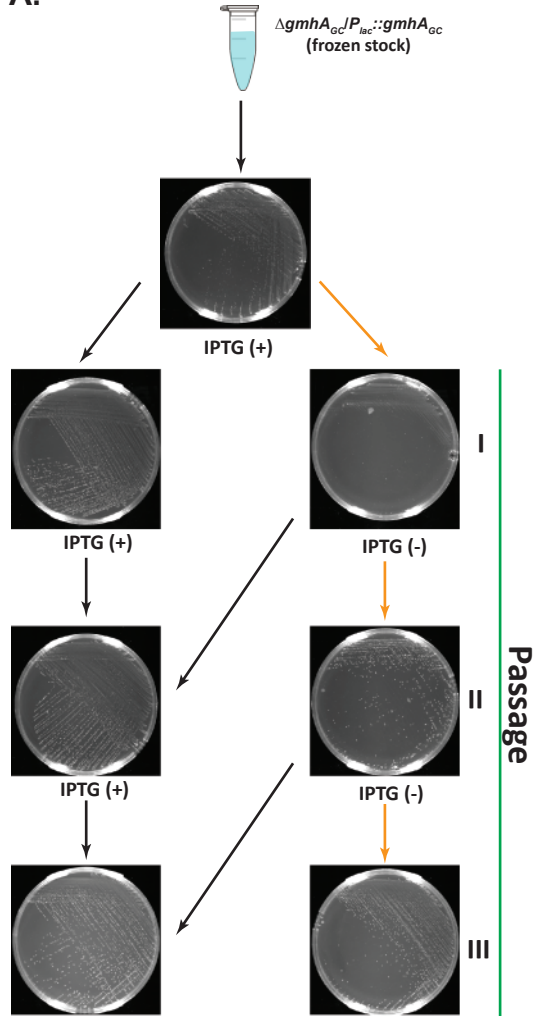

B.

$P_{lac}$  sequence

|                                                                   |                                        |
|-------------------------------------------------------------------|----------------------------------------|
| default                                                           | <b>TTTACACTTTATGCTTCCGGCTCGTATGTTG</b> |
| $\Delta gmhA_{GC}/P_{lac}::gmhA_{GC}$                             | <b>TTTACACTTTATGCTTCCGGCTCGTATGTTG</b> |
| $\Delta gmhA_{GC}/P_{lac}::gmhA_{GC}$<br>passage III without IPTG | <b>GCTGTTGAATTAATCATCGGCTCGTATAATG</b> |

C.

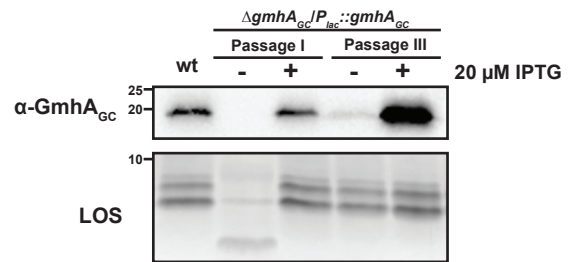

# Supplemental Figure S3

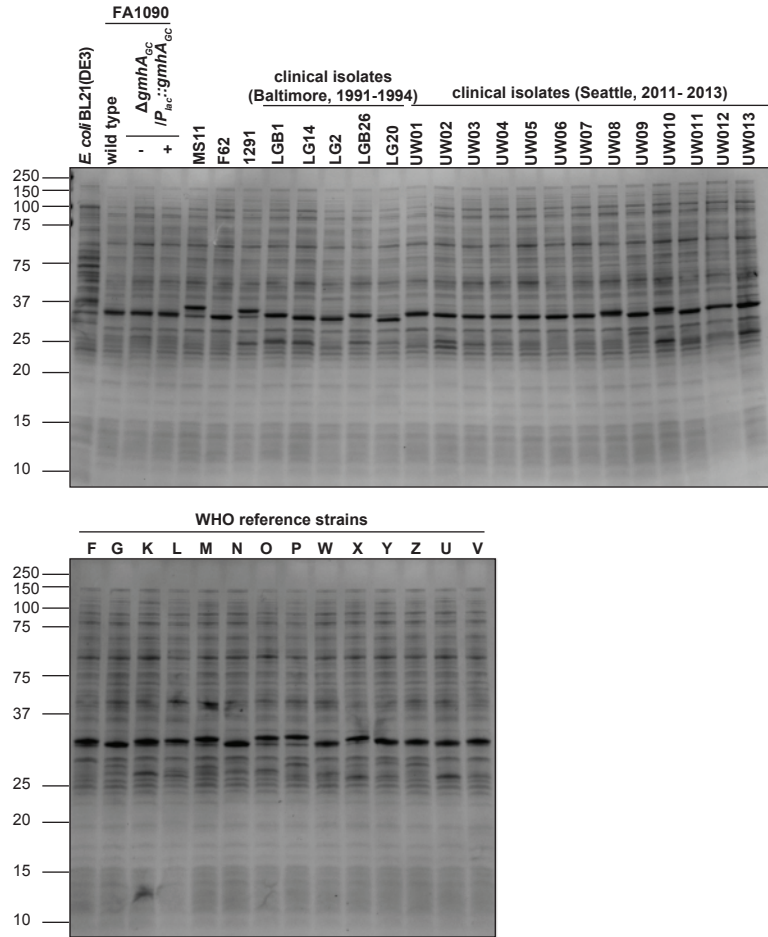

# Supplemental Figure S4

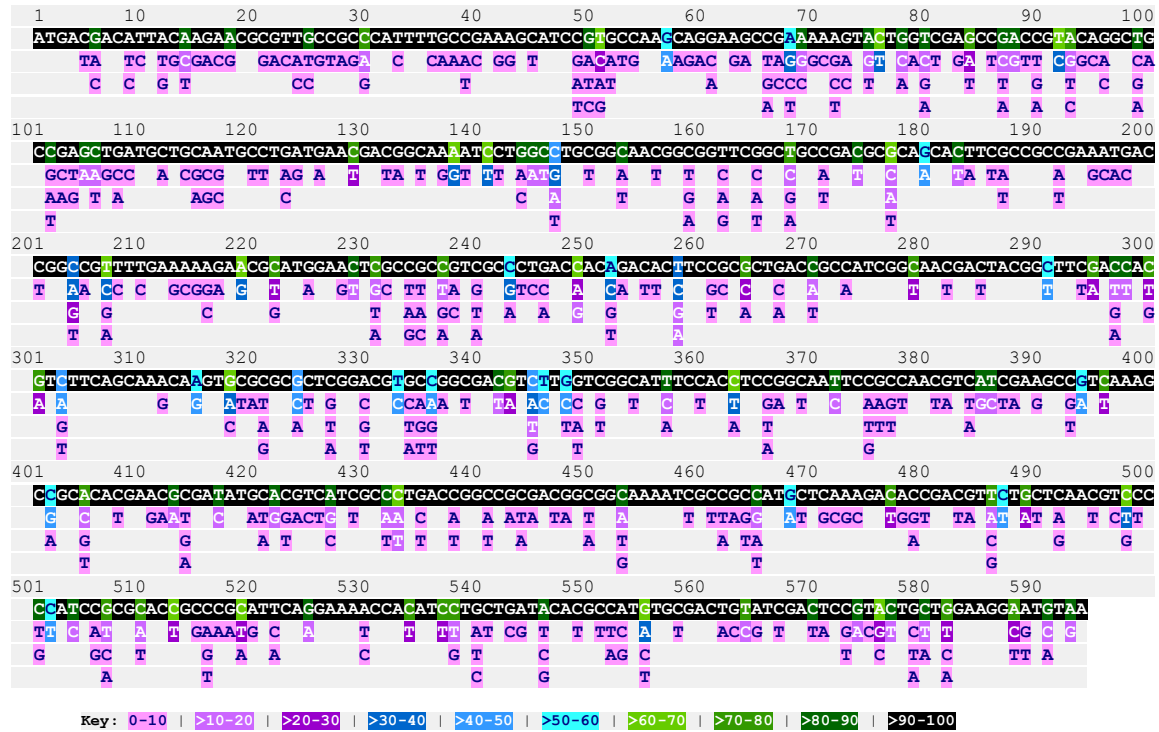

Supplement: MBO3-6-na-s001.pdf [file MBO3-6-na-s001.pdf]
